# Supplementary material for: Hypoxia-induced lncRNA RBM5-AS1 promotes tumorigenesis via activating Wnt/β-catenin signaling in breast cancer
Source: PubMed Central journal article supplement (PMC8810931; doi:10.1038/s41419-022-04536-y), 2022-02-02

**Fig 2J**

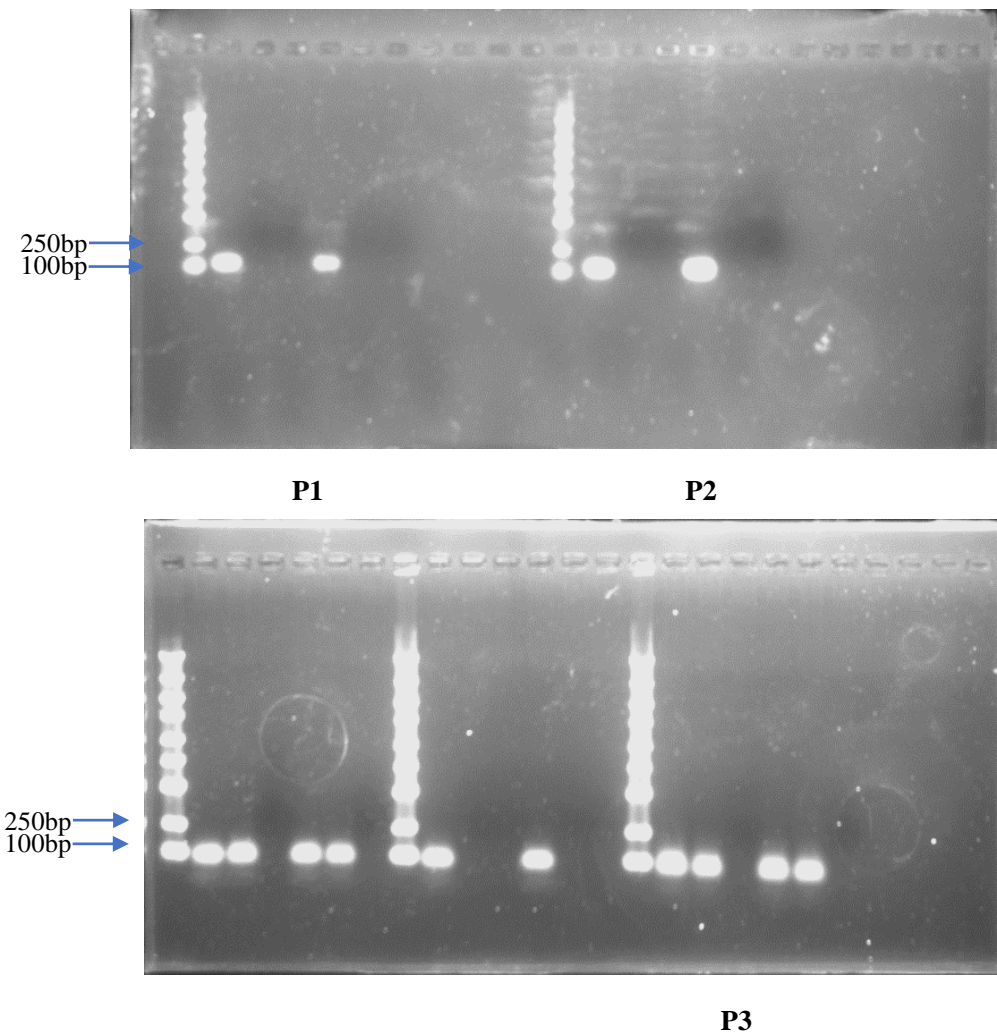

**Fig 2L**

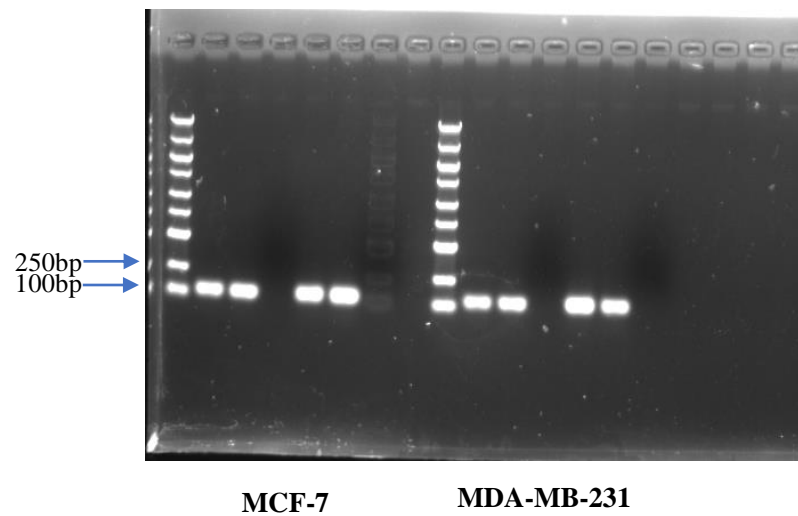

**Fig 3G**

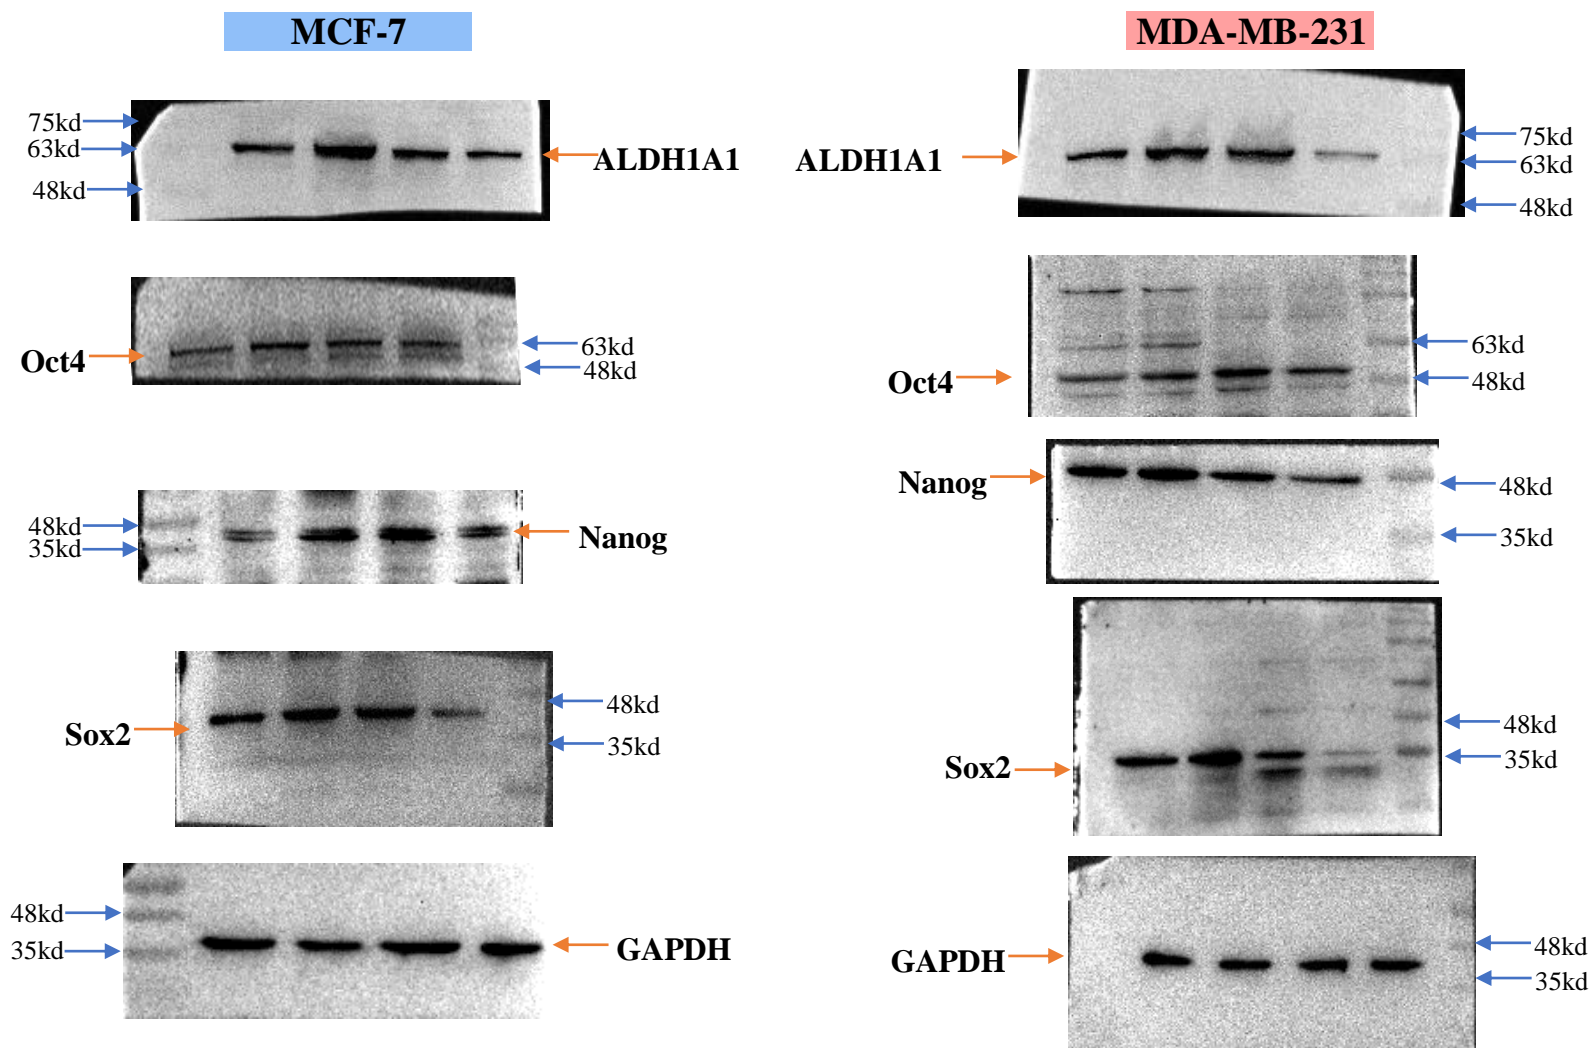

**Fig 5C**

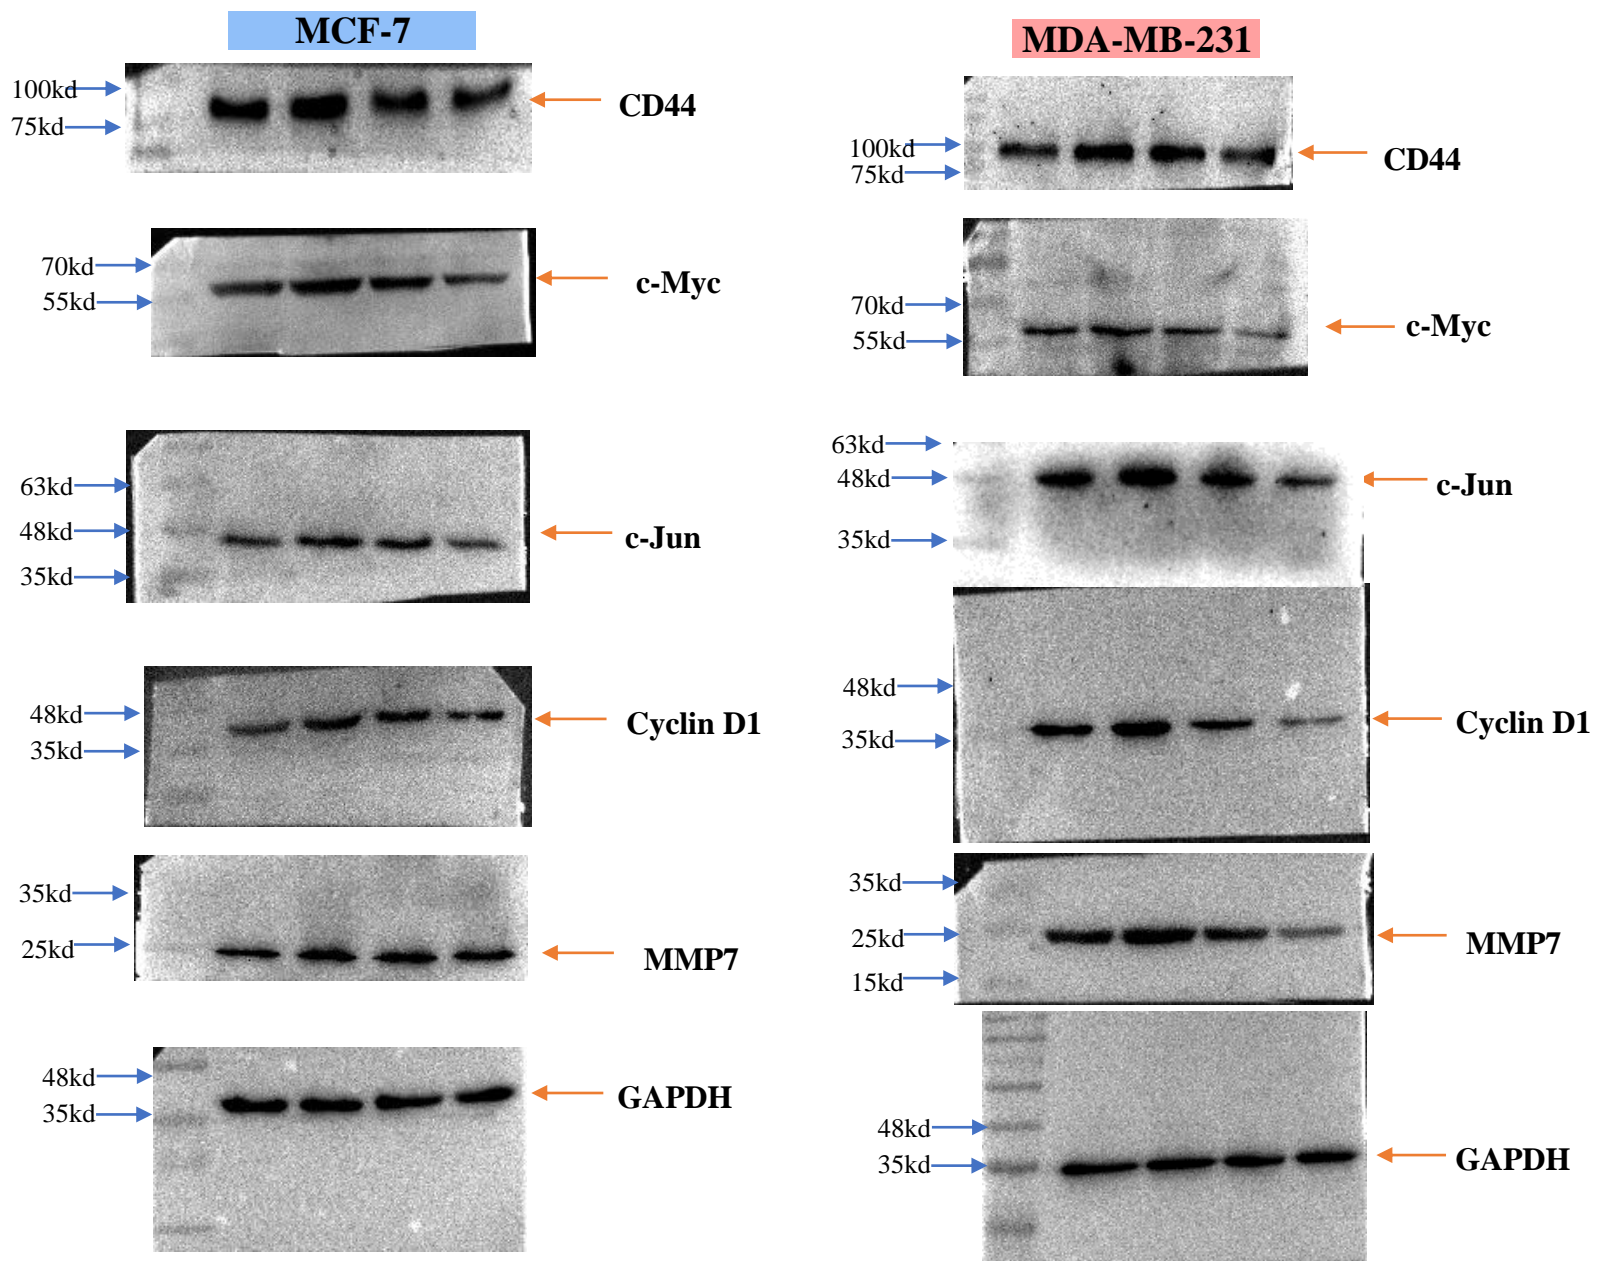

**Fig 5F**

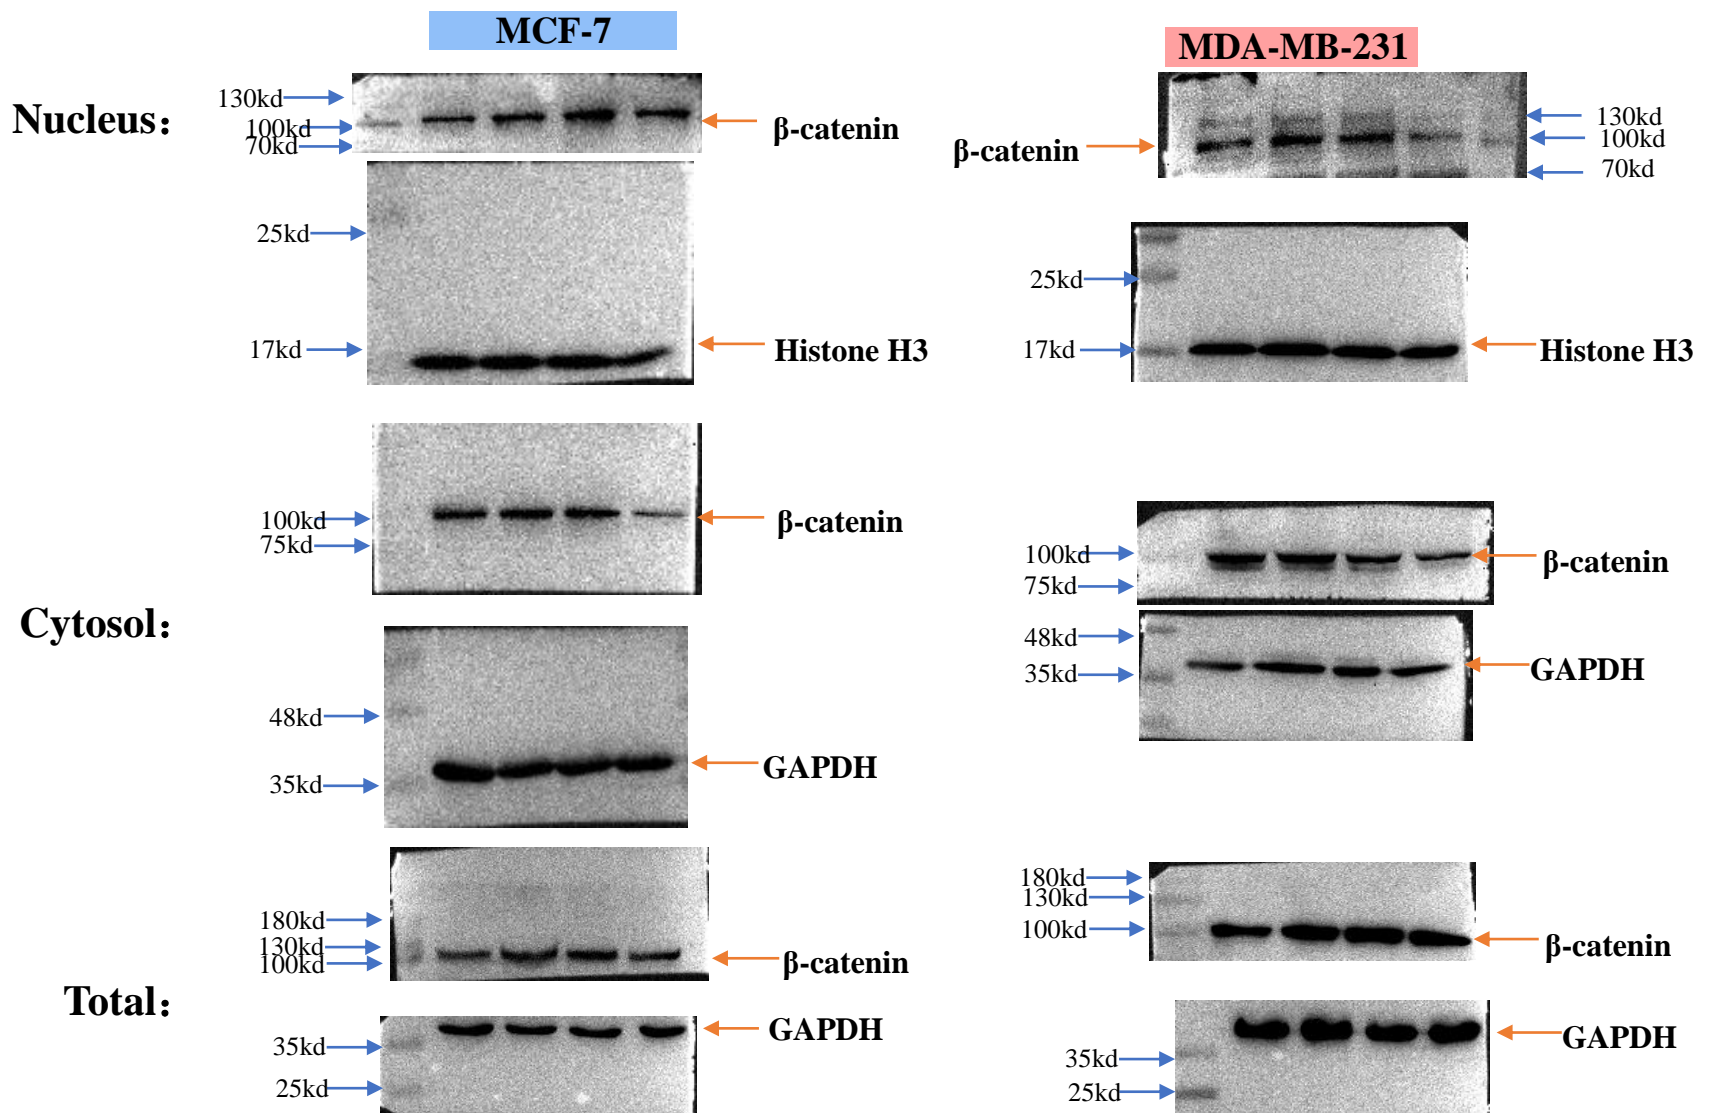



**Fig 6B**

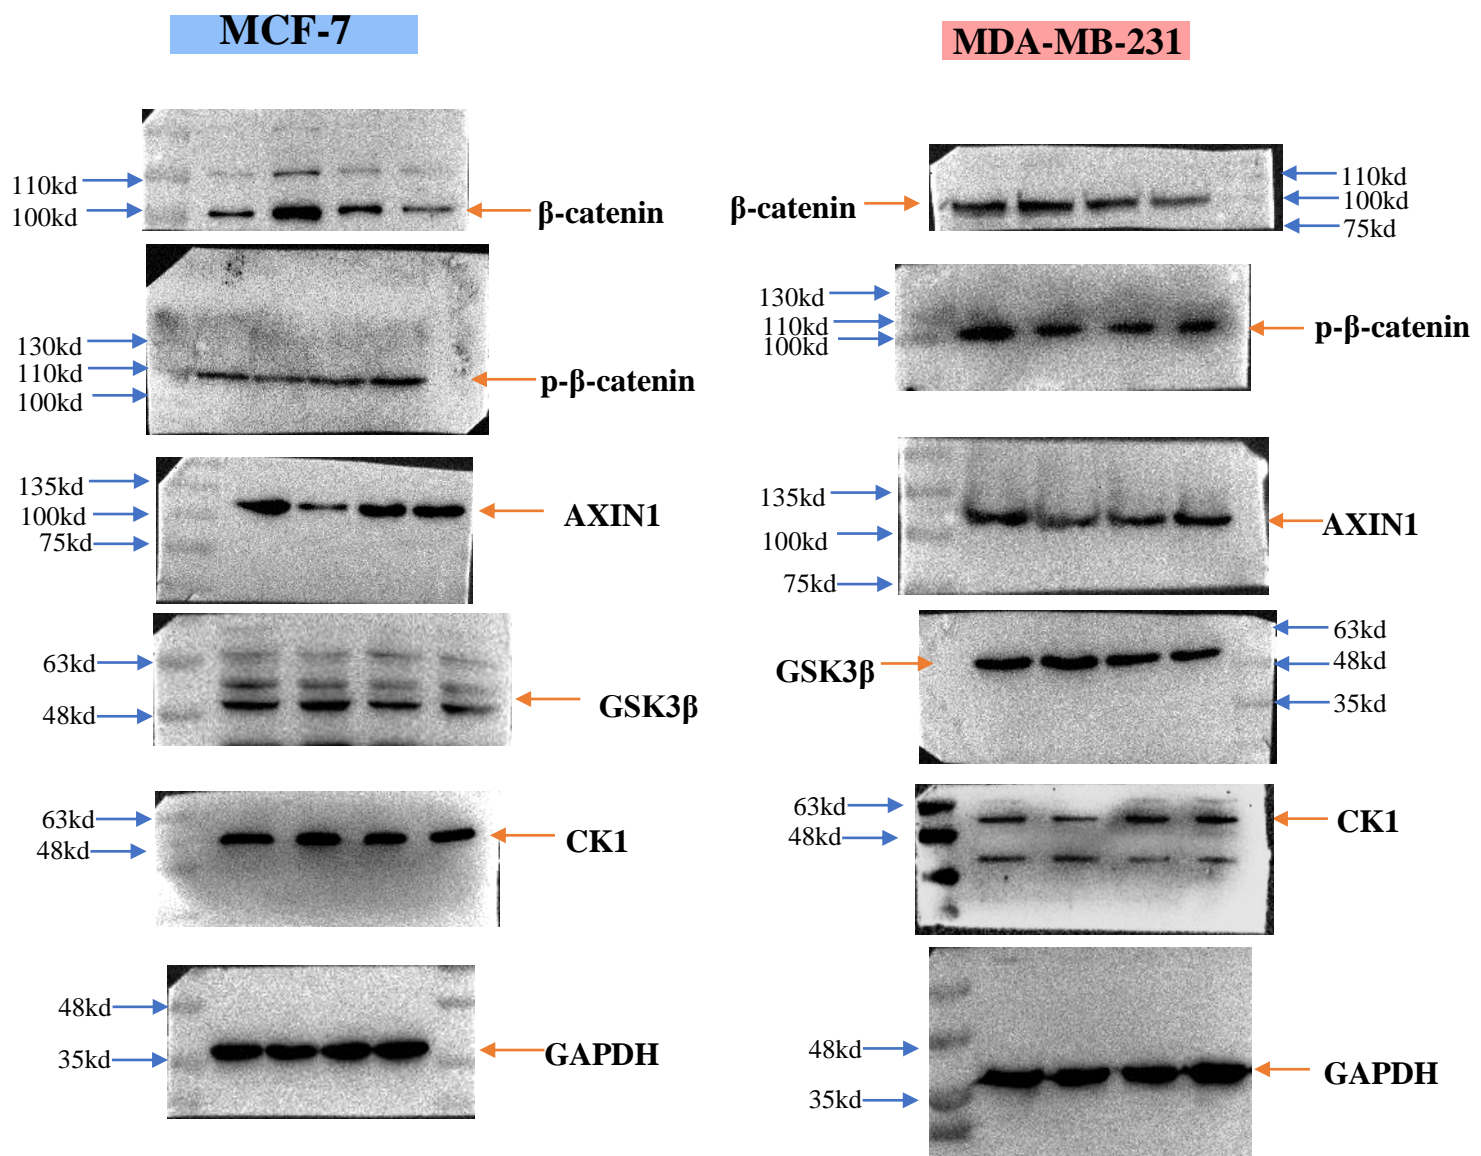

**Fig 6I**

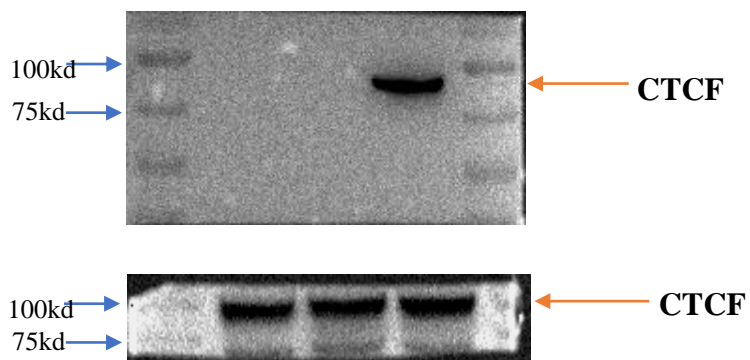

**Fig 6J**

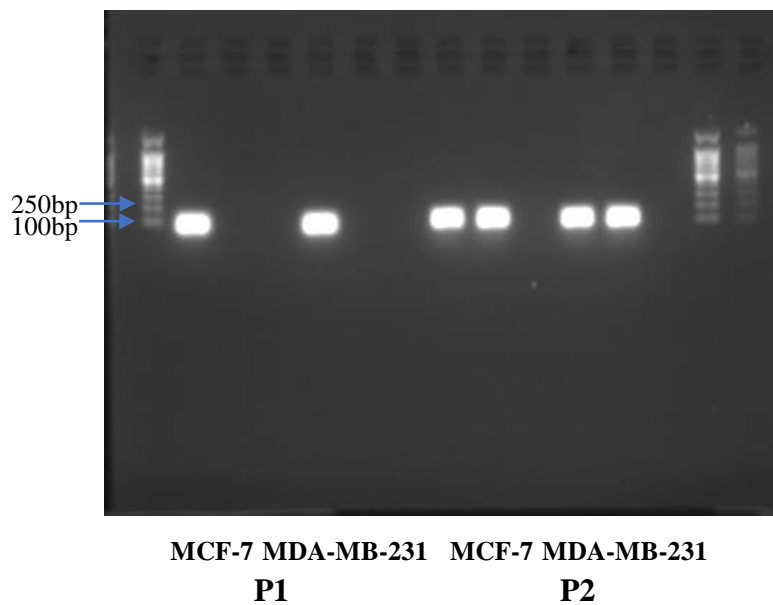

**Fig 6K**

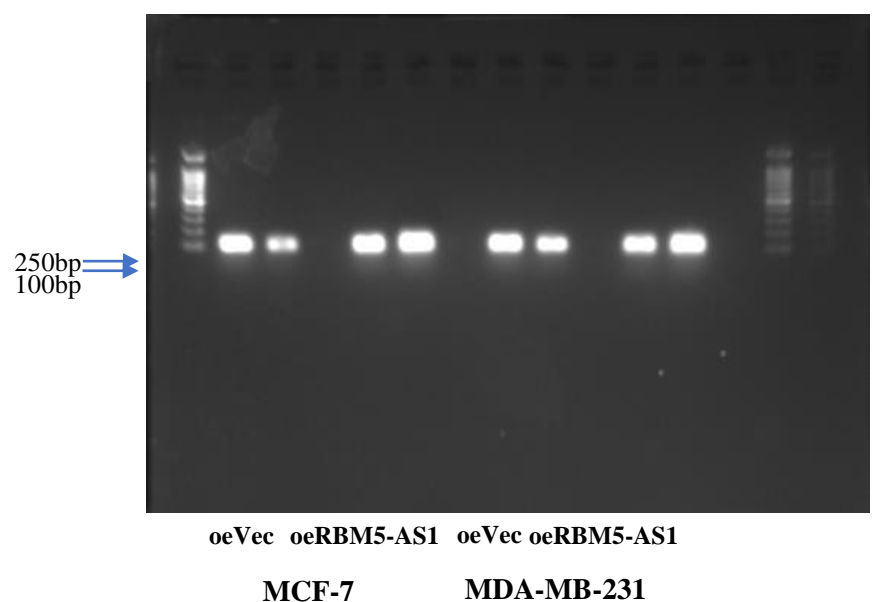

**Fig 6M**

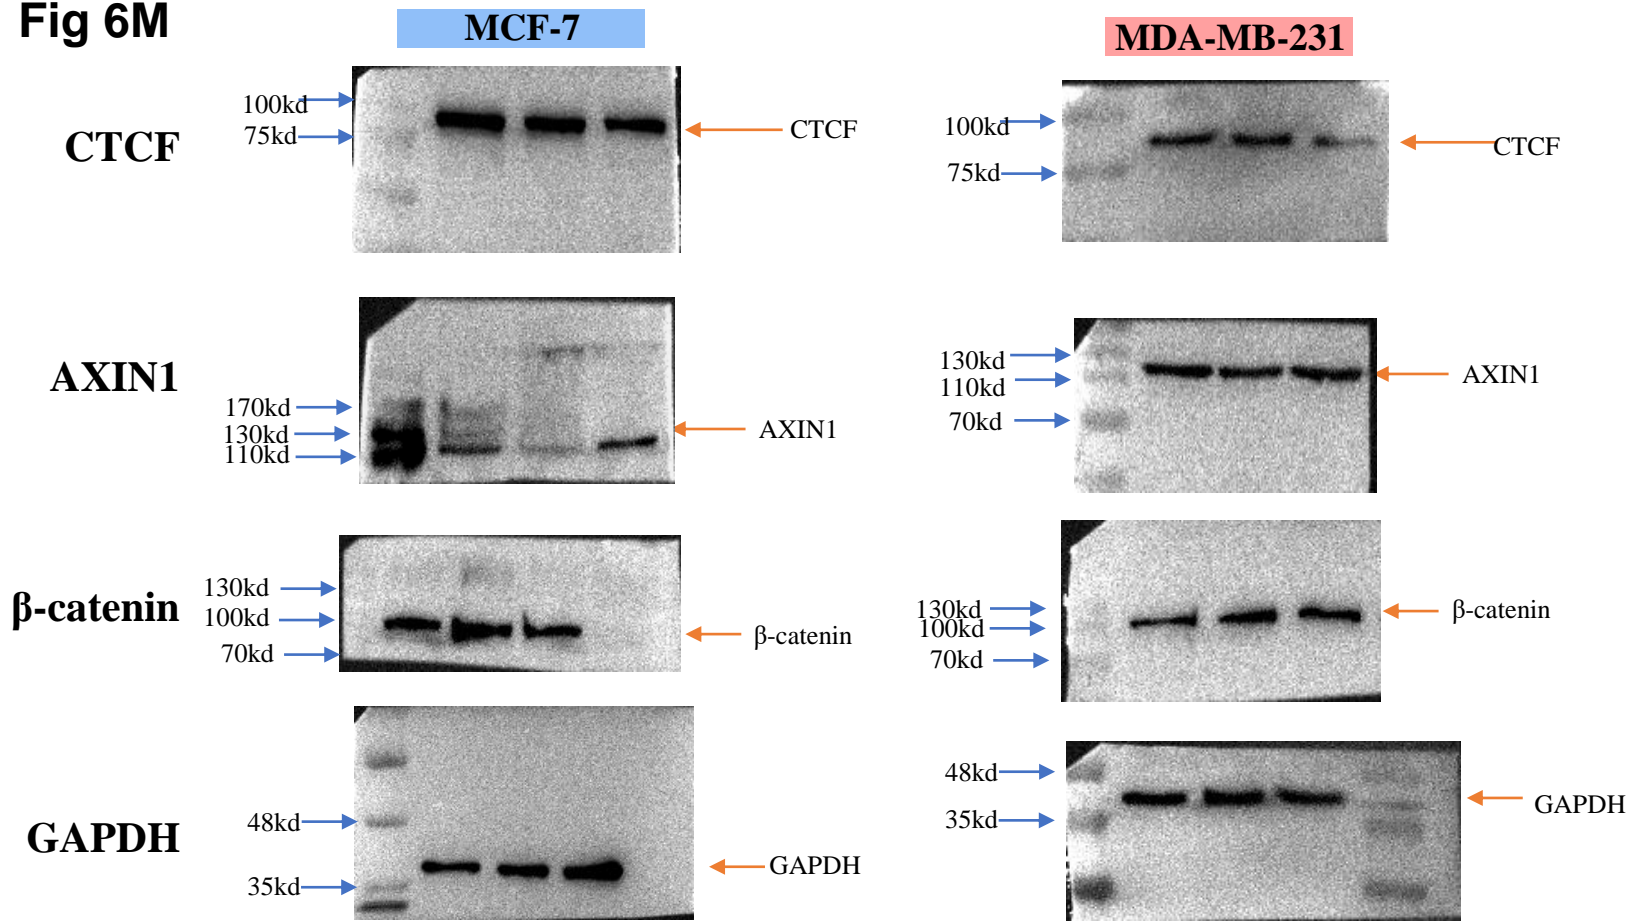

**Fig 7D**

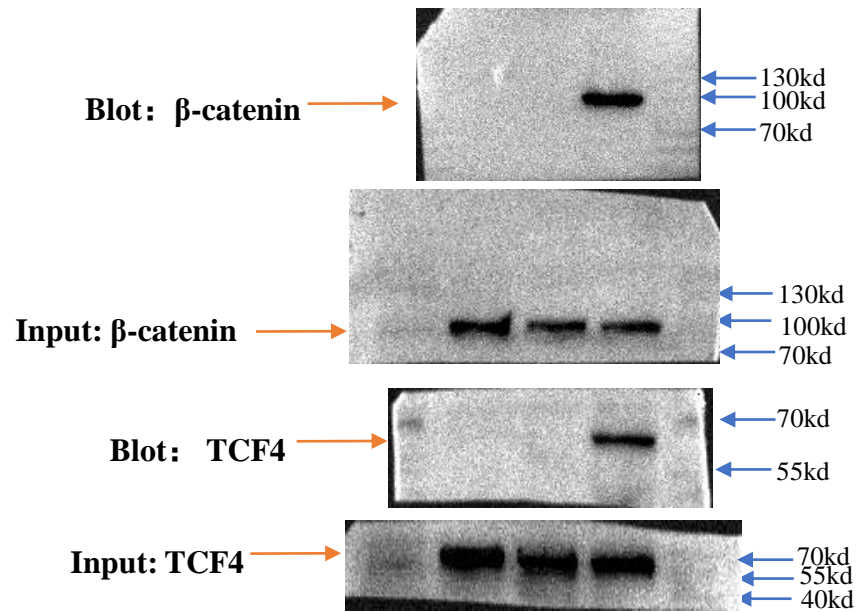

**Fig 7G**

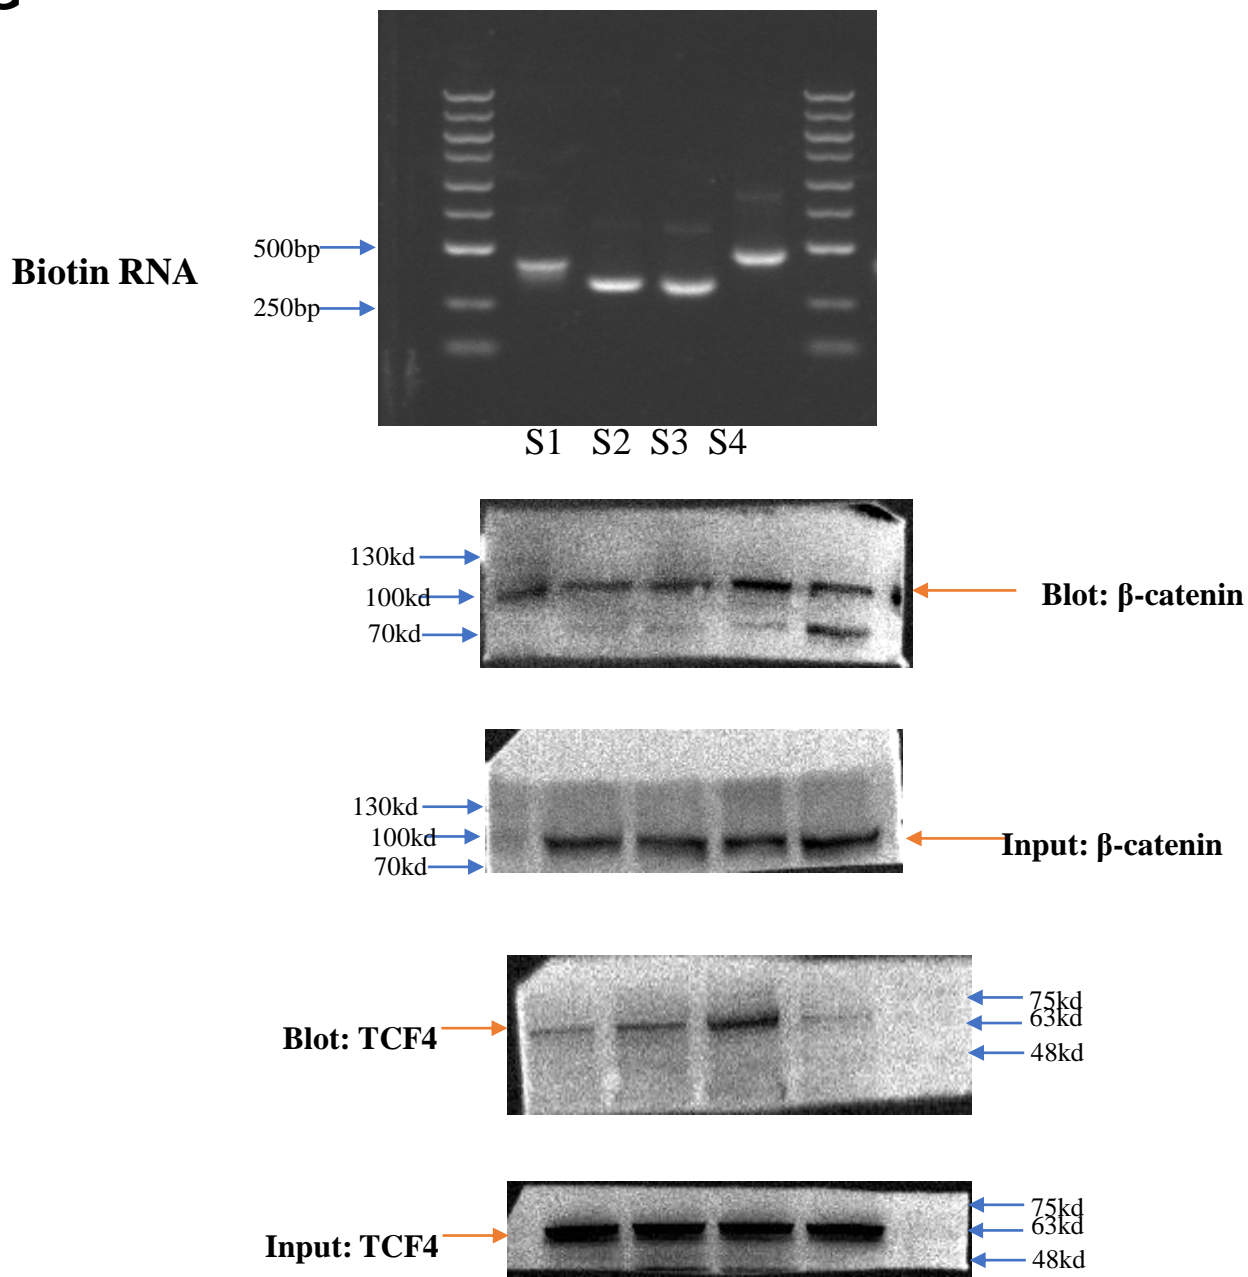

**Fig 7I**

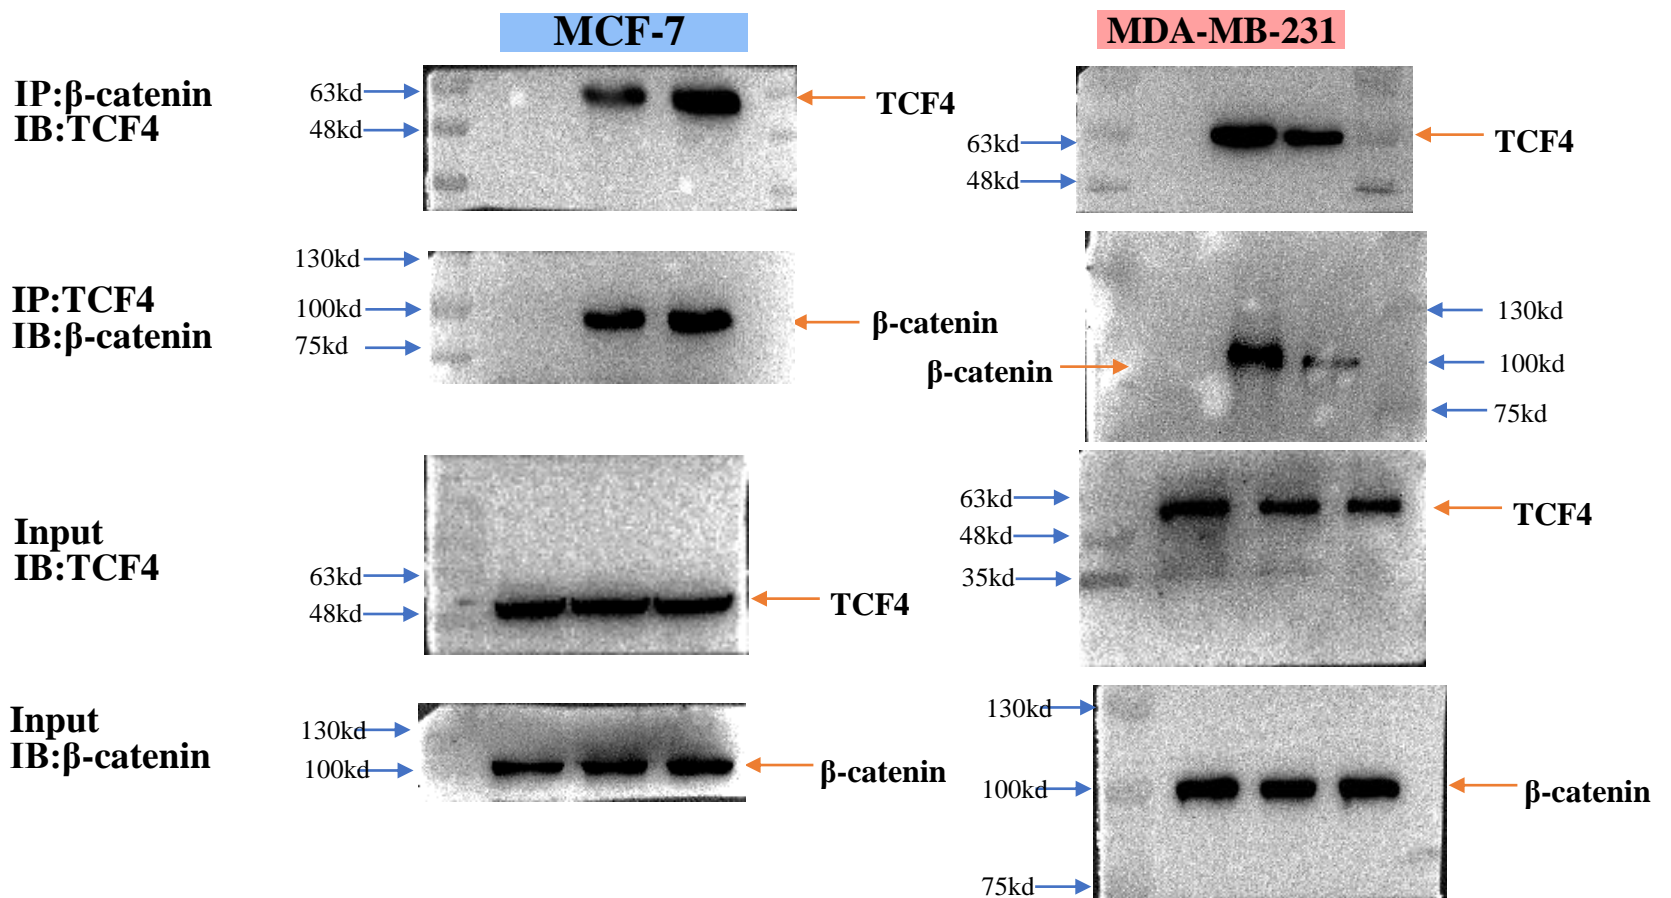



**Fig S1E**

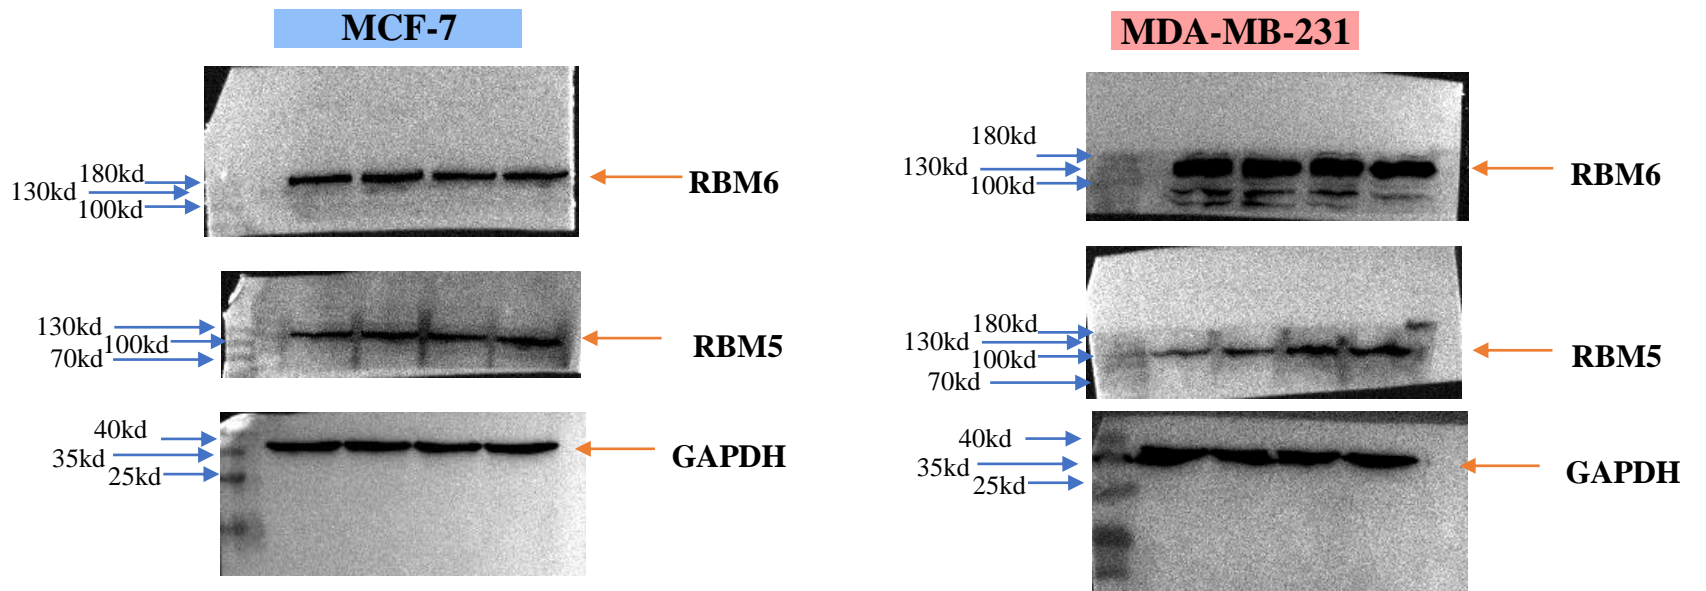

**Fig S2G**

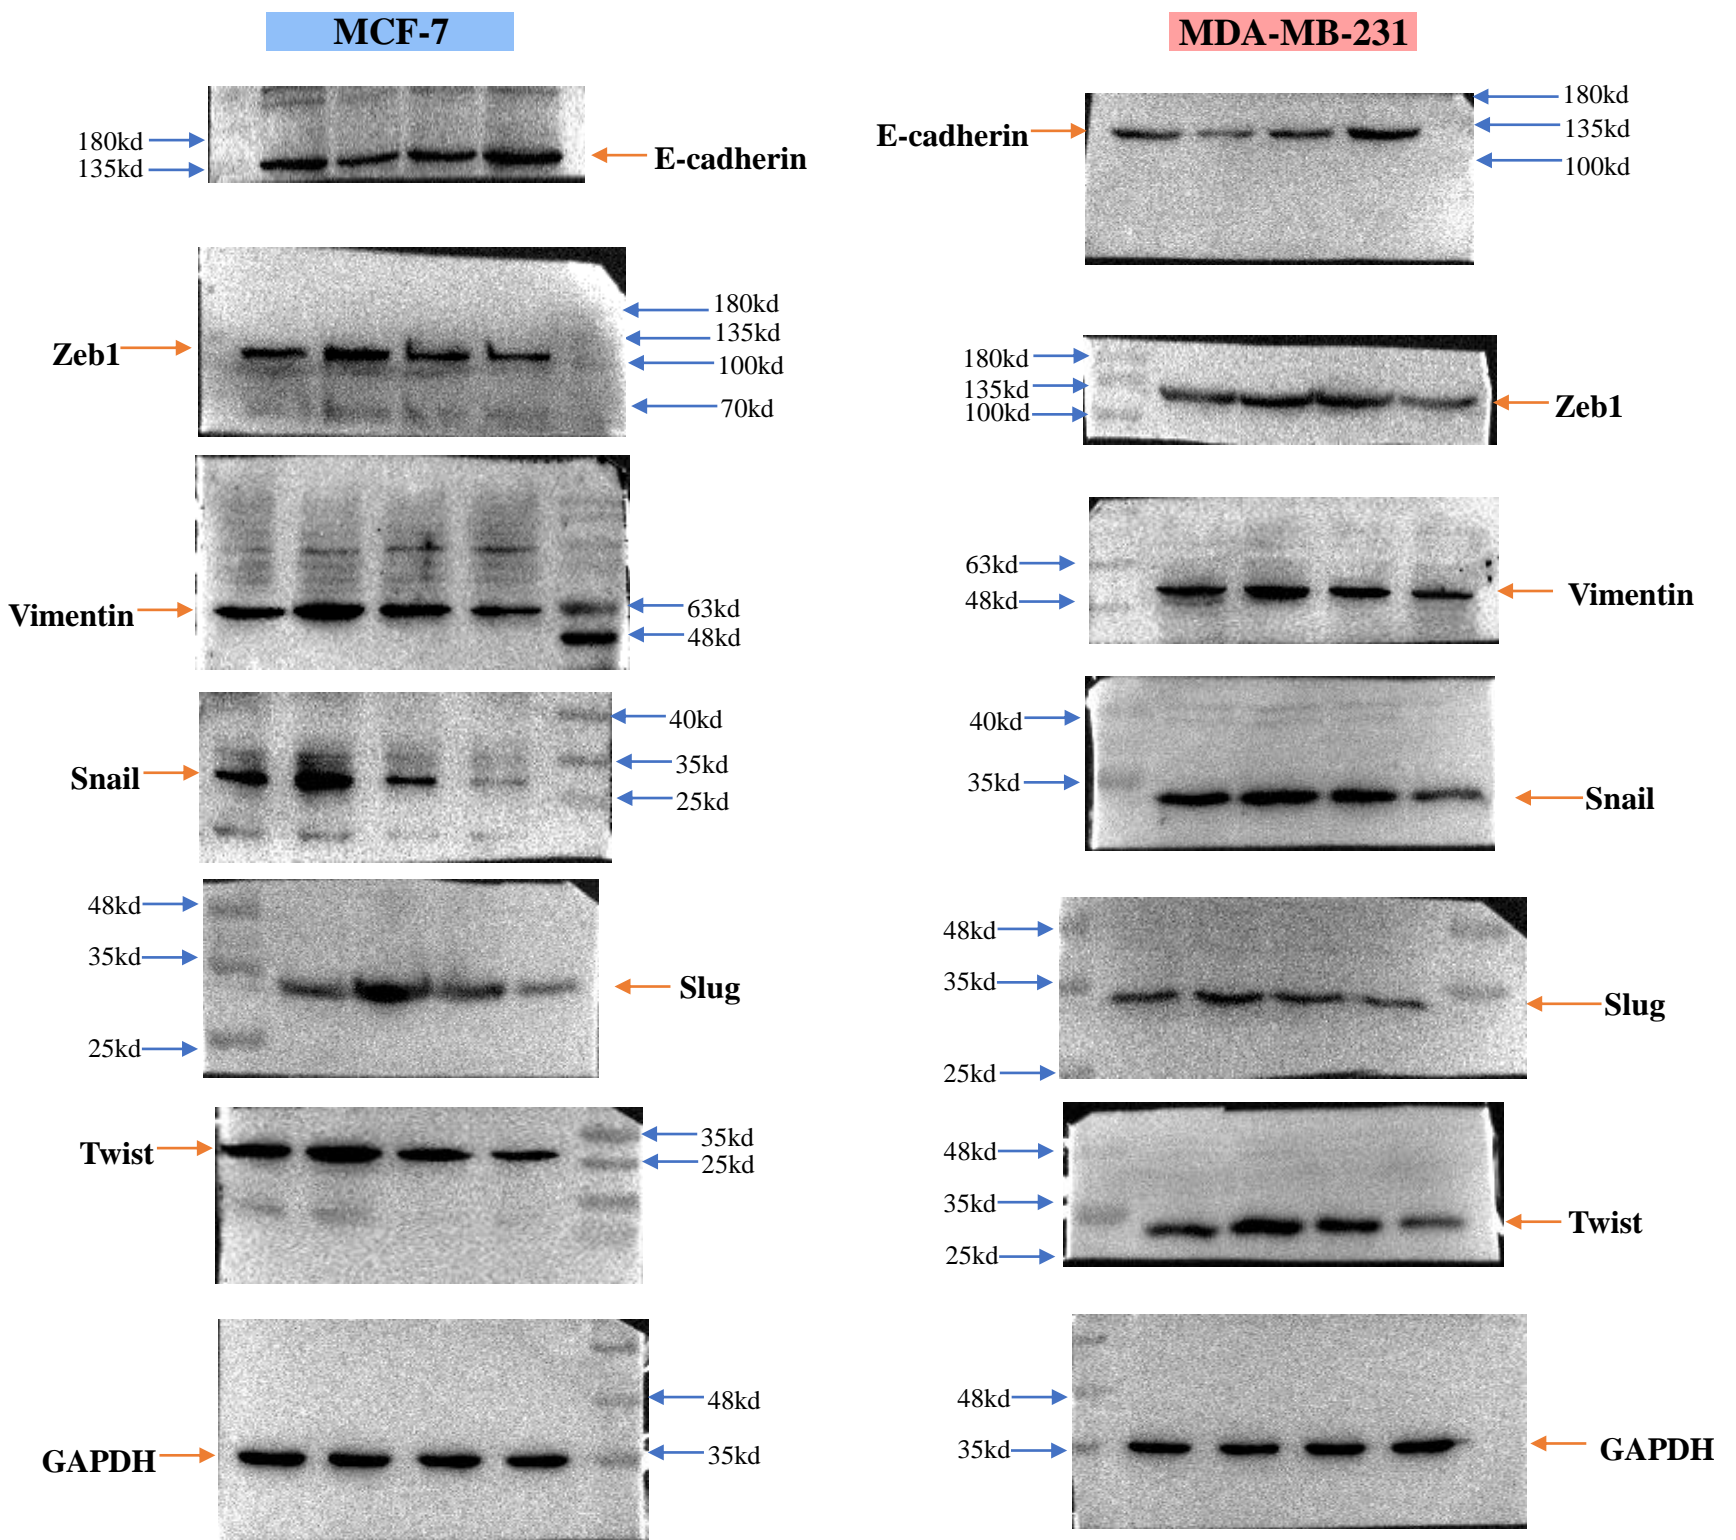

Supplement: 41419_2022_4536_MOESM5_ESM.pdf [file 41419_2022_4536_MOESM5_ESM.pdf]
